# Supplementary material for: Associations of Food and Nutrient Intake with Serum Hepcidin and the Risk of Gestational Iron-Deficiency Anemia among Pregnant Women: A Population-Based Study
Source: MDPI journal article supplement (doi:10.3390/nu13103501), 2021-10-03
Supplement: s1 [file s1]

Supplementary Table S1. Food items and food groups included in the multiple linear regression analysis of gestational serum hepcidin levels

| <b>Food group</b> |                                                | <b>Food items</b> |                                                                                              |
|-------------------|------------------------------------------------|-------------------|----------------------------------------------------------------------------------------------|
| 1.                | Rice and rice porridge                         | 1.                | Rice and grains.                                                                             |
|                   |                                                | 2.                | Rice porridge.                                                                               |
| 2.                | Noodles and related products                   | 3.                | Noodles and related products.                                                                |
| 3.                | Breakfast cereals, oats, and related products  | 4.                | Breakfast cereals, oats, and related products.                                               |
| 4.                | Bread and its products                         | 5.                | Bread its products.                                                                          |
| 5.                | Chinese dim sum and related foods              | 6.                | Chinese savory cakes.                                                                        |
|                   |                                                | 7.                | Chinese buns and rolls.                                                                      |
|                   |                                                | 8.                | Salty steamed buns.                                                                          |
|                   |                                                | 9.                | Dumplings.                                                                                   |
| 6.                | Sweet buns, bean buns, and related products    | 10.               | Sweet buns; red beans.                                                                       |
|                   |                                                | 11.               | Mung beans, black eye beans, speckled kidney beans, and other seed beans and their products. |
| 7.                | Savory and sweet glutinous rice products       | 12.               | Glutinous rice.                                                                              |
|                   |                                                | 13.               | Glutinous rice desserts.                                                                     |
| 8.                | Roots and tubers                               | 14.               | Root and tubers.                                                                             |
| 9.                | Eggs                                           | 15.               | Eggs.                                                                                        |
| 10.               | Dairy products                                 | 16.               | Fresh milk, milk powder.                                                                     |
|                   |                                                | 17.               | Flavored milk.                                                                               |
|                   |                                                | 18.               | Yogurt.                                                                                      |
|                   |                                                | 19.               | Cheese.                                                                                      |
| 11.               | Non-dairy milk products                        | 20.               | Soy milk, honey/soy milk, tofu pudding and other soy milk drinks or products.                |
|                   |                                                | 21.               | Rice milk.                                                                                   |
| 12.               | Light-colored vegetables                       | 22.               | Light-colored vegetables.                                                                    |
| 13.               | Dark leafy vegetable                           | 23.               | Dark-colored vegetables                                                                      |
| 14.               | Gourds, shoots, and root vegetables            | 24.               | Carrots.                                                                                     |
|                   |                                                | 25.               | Root vegetables.                                                                             |
|                   |                                                | 26.               | Bamboo shoot.                                                                                |
|                   |                                                | 27.               | Gourds.                                                                                      |
| 15.               | Mushrooms and related products                 | 28.               | Mushrooms.                                                                                   |
| 16.               | Legumes                                        | 29.               | Beans, legumes.                                                                              |
| 17.               | Marine vegetables                              | 30.               | Sea vegetables.                                                                              |
|                   |                                                | 31.               | Kelp.                                                                                        |
| 18.               | Pickled vegetables                             | 32.               | Pickled vegetables.                                                                          |
| 19.               | Herbs and spices                               | 33.               | Herbs and spices.                                                                            |
| 20.               | Total vegetables                               | Total vegetables  |                                                                                              |
| 21.               | Soybean products                               | 34.               | Gluten and gluten sausages.                                                                  |
|                   |                                                | 35.               | General soy products.                                                                        |
|                   |                                                | 36.               | Soy-fermented foods.                                                                         |
| 22.               | Nuts and seeds                                 | 37.               | Nuts and seeds.                                                                              |
| 23.               | Fresh fruits                                   | 38.               | Fresh fruits.                                                                                |
| 24.               | 100% pure fruit juice or fruit/vegetable juice | 39.               | 100% pure fruit juice or fruit and vegetable juice.                                          |
|                   |                                                | 40.               | Commercially available sugary vegetable juices.                                              |
| 25.               | Canned fruits, dried fruits, and jam           | 41.               | Canned fruits.                                                                               |
|                   |                                                | 42.               | Dehydrated fruits, pickled fruits, candied fruits.                                           |

|                                        |                                                 |
|----------------------------------------|-------------------------------------------------|
|                                        | 43. Jam.                                        |
| 26. Fish, shellfish, and seafood       | 44. Fish (including all fish).                  |
|                                        | 45. Aquatic products eaten with bones or shell. |
|                                        | 46. Edible sea snails and mollusks.             |
|                                        | 47. Other seafood except fish and mollusks.     |
| 27. Omega-3-rich fish                  | 48. Deep-sea (high $\omega$ -3) fish.           |
| 28. Roe and processed seafood products | 49. Roe of marine animals.                      |
|                                        | 50. Processed seafood products.                 |
| 29. Poultry meat                       | 51. Poultry meat.                               |
| 30. Lean livestock meat                | 52. Lean livestock meat.                        |
| 31. Medium-fat livestock meat          | 53. Medium-fat livestock meat.                  |
| 32. Liver, organs, and blood products  | 54. Liver.                                      |
|                                        | 55. Other internal organs besides the liver.    |
|                                        | 56. Poultry and livestock blood.                |
|                                        | 57. Other parts of poultry and livestock.       |
| 33. Processed meat products            | 58. Processed meat products.                    |
|                                        | 59. Processed meat paste products.              |
